# Supplementary material for: Randomisierte kontrollierte multizentrische Studie zur Albuminersatztherapie im septischen Schock (ARISS)
Source: Springer Nature journal article supplement (doi:10.1007/s00101-021-00952-5), 2021-03-31
Supplement: MOESM1 [file 19023882]

## 1 Tabelle Organisatorische Struktur der klinischen Prüfung

2

3 **Zusatzmaterial zum Beitrag** „Randomisierte kontrollierte multizentrische Studie zur Albuminersatz-therapie im septischen  
4 Schock - ARISS“ von Sakr Y, Gattinoni L, SepNet-Critical-Care-Trials-Gruppe (2021) in *Der Anaesthesist*.

5 Beitrag und Zusatzmaterial stehen Ihnen auf [www.springermedizin.de](http://www.springermedizin.de) zur Verfügung. Bitte geben Sie dort den Beitragstitel  
6 in die Suche ein.

8

9

| <b>Funktion/ Qualifikation</b>                                     | <b>Name</b>                                                                                                                                                                                                                                                   | <b>Affiliation</b>                                                                                                                                                                                                                 |
|--------------------------------------------------------------------|---------------------------------------------------------------------------------------------------------------------------------------------------------------------------------------------------------------------------------------------------------------|------------------------------------------------------------------------------------------------------------------------------------------------------------------------------------------------------------------------------------|
| Sponsor gemäß Arzneimittelgesetz                                   | Friedrich Schiller University<br>Jena                                                                                                                                                                                                                         |                                                                                                                                                                                                                                    |
| Sponsorbevollmächtigter und<br>Leiter der klinischen Prüfung (LKP) | Prof. Dr. Yasser Sakr                                                                                                                                                                                                                                         | Universitätsklinikum Jena,<br>Klinik für Anästhesiologie und<br>Intensivmedizin                                                                                                                                                    |
| Vertreter des LKP                                                  | Prof. Dr. Michael Bauer                                                                                                                                                                                                                                       | Universitätsklinikum Jena,<br>Klinik für Anästhesiologie und<br>Intensivmedizin                                                                                                                                                    |
| Protokollkomitee                                                   | Prof. Dr. Yasser Sakr,<br>Prof. Dr. Michael Bauer,<br><br>Dr. Ulrike Schumacher<br>Dr. Maria Breternitz<br>Dr. Sabine Barta<br><br>Prof. Dr. Michael<br>Hartmann,<br>PD Dr. Michael Kiehntopf<br><br>Prof. Dr. Luciano Gattinoni<br>Prof. Dr. Michael Quintel | Universitätsklinikum Jena, Klinik<br>für Anästhesiologie und<br>Intensivmedizin<br><br>Universitätsklinikum Jena,<br>Zentrum für Klinische Studien<br>(ZKS)<br><br>Universitätsklinikum Jena<br><br>Universitätsklinikum Göttingen |
| Biometriker                                                        | Dr. Ulrike Schumacher                                                                                                                                                                                                                                         | Universitätsklinikum Jena,<br>Zentrum für Klinische Studien<br>(ZKS)                                                                                                                                                               |

| <b>Funktion/ Qualifikation</b>                                                                   | <b>Name</b>                                                                                             | <b>Affiliation</b>                                                                                                                                                                                                                                                          |
|--------------------------------------------------------------------------------------------------|---------------------------------------------------------------------------------------------------------|-----------------------------------------------------------------------------------------------------------------------------------------------------------------------------------------------------------------------------------------------------------------------------|
| Projektmanagement                                                                                | Dr. Franziska Weber                                                                                     | Universitätsklinikum Jena,<br>Zentrum für Klinische Studien                                                                                                                                                                                                                 |
| Datenmanagement                                                                                  | Aicko Helbig                                                                                            | Universitätsklinikum Jena,<br>Zentrum für Klinische Studien                                                                                                                                                                                                                 |
| Monitoring                                                                                       | Dr. Christine Gampe<br><br>Silvia Apel                                                                  | Universitätsklinikum Jena,<br>Zentrum für Klinische Studien<br><br>Universitätsklinikum Göttingen,<br>Zentrum für Klinische Studien                                                                                                                                         |
| Pharmacovigilanz (Safety-<br>Management)                                                         | Dr. Mariann Städtler<br><br>Sandra Birr                                                                 | Universitätsklinikum Jena,<br>Zentrum für Klinische Studien                                                                                                                                                                                                                 |
| zentrale Apotheke für Lagerung<br>und Versand des Prüfpräparates an<br>Apotheken der Prüfzentren | Prof. Dr. Michael Hartmann                                                                              | Apotheke, Universitätsklinikum<br>Jena                                                                                                                                                                                                                                      |
| Apotheken für Bereitstellung des<br>Prüfpräparates an die Prüfzentren                            | local pharmacy of the<br>respective trial centre                                                        |                                                                                                                                                                                                                                                                             |
| Ökonomische Analyse                                                                              | Prof. Dr. Michael Hartmann                                                                              | Apotheke, Universitätsklinikum,<br>Jena                                                                                                                                                                                                                                     |
| Komitee für Sicherheit –SMC                                                                      | Prof. Dr. Ricard Ferrer<br><br>Prof. Dr. Marco Ranieri<br><br>Dr. Hassane Njimi                         | Dept. of Intensive Care, Hospital<br>Universitari Vall d 'Hebron<br>Barcelona, Spain<br><br>Dept. of Anesthesiology and<br>Intensive Care, Sapienza<br>University of Rome, Italy<br><br>Dept. of Critical Care, Erasme<br>Hospital, Free University of<br>Brussels, Belgium |
| zuständige Bundesoberbehörde<br>(BOB)                                                            | Paul-Ehrlich-Institut (PEI),<br>Bundesinstitut für<br>Impfstoffe und<br>biomedizinische<br>Arzneimittel |                                                                                                                                                                                                                                                                             |
| federführende Ethik-Kommission                                                                   | Ethik-Kommission der<br>Friedrich-Schiller-<br>Universität Jena                                         |                                                                                                                                                                                                                                                                             |

| Funktion/ Qualifikation | Name                                            | Affiliation |
|-------------------------|-------------------------------------------------|-------------|
| Prüfzentren             | SepNet - Critical Care Trials<br>Group, Germany |             |
